# Supplementary material
Source: PubMed Central journal article supplement (PMC6644320)
Supplement: ao7b00284_si_001.pdf [file ao7b00284_si_001.pdf]

## **Quantification of circulating cancer biomarkers via sensitive topographic measurements on single binder nanoarrays**

Elena Ambrosetti<sup>1,2,3\*</sup>, Pamela Paoletti<sup>1,4</sup>, Alessandro Bosco<sup>5</sup>, Pietro Parisse<sup>1</sup>, Denis Scaini<sup>1,2</sup>, Elda Tagliabue<sup>6</sup>, Ario de Marco<sup>7</sup>, Loredana Casalis<sup>1\*</sup>

<sup>1</sup> Elettra-Sincrotrone S.C.p.A., Nanoinnovation lab, ss 14 km 163.5 in Area Science Park, 34149 Basovizza-Trieste, Italy

<sup>2</sup> University of Trieste, PhD School in Nanotechnology, Piazzale Europa 1, 34127 Trieste, Italy

<sup>3</sup> INSTM-ST Unit, ss 14 km 163.5 in Area Science Park, 34149 Basovizza-Trieste, Italy

<sup>4</sup> International School for Advanced Studies (SISSA), Via Bonomea 265, 34136 Trieste, Italy

<sup>5</sup> Karolinska Institutet, Department of Medical Biochemistry and Biophysics, Scheeles väg, 17177 Stockholm, Sweden

<sup>6</sup> Fondazione IRCCS-Istituto Nazionale dei Tumori, Department of Experimental Oncology and Molecular Medicine, Via Amadeo 42, 20133 Milano, Italy

<sup>7</sup> Center for biomedical sciences and engineering, University of Nova Gorica, Dvorec Lanthieri, Glavni Trg 8, 5271 Vipava, Slovenia

\* Correspondence: [loredana.casalis@elettra.eu](mailto:loredana.casalis@elettra.eu); Tel.: +39-040-375-8291; Fax: +39-040-938-0902

---

\* Present address: Karolinska Institutet, Department of Medical Biochemistry and Biophysics, Scheeles väg, 17177 Stockholm, Sweden

## Supporting Information

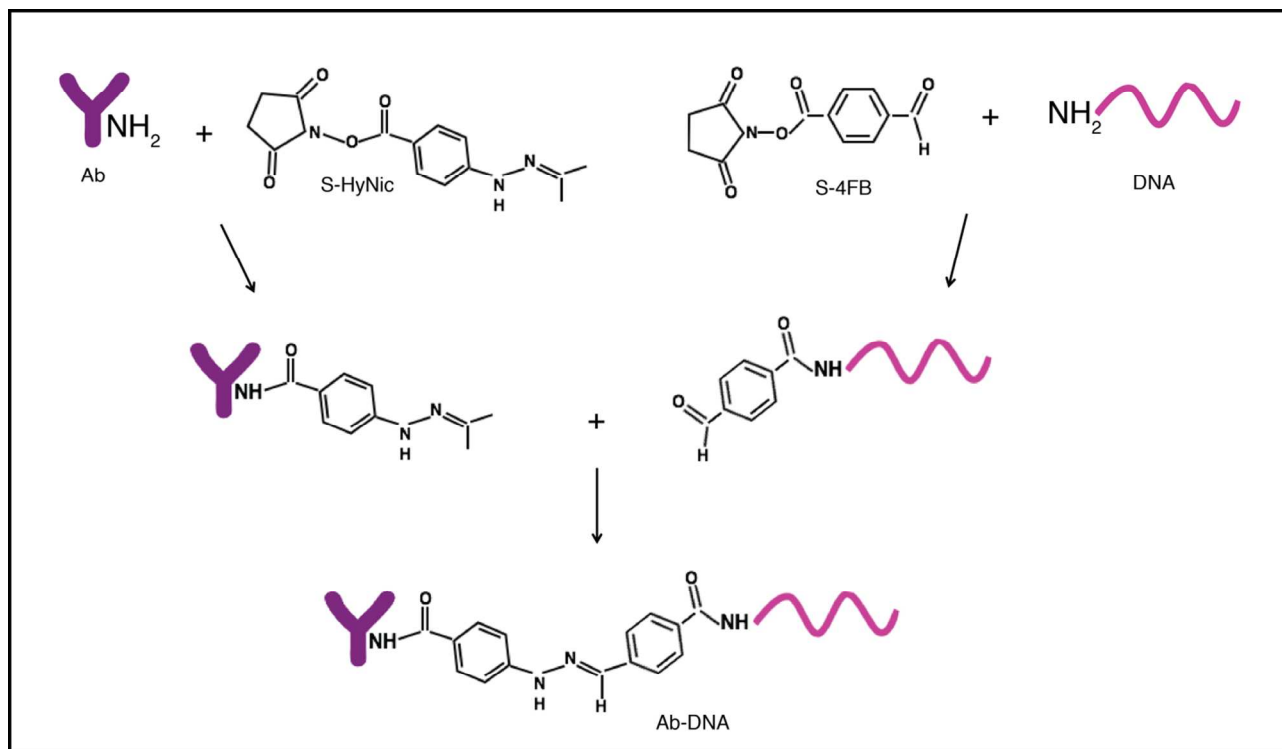

**Figure S1** Schematic representation of Antibody-DNA conjugation reaction: first the Ab is functionalized with S-HyNic group and DNA is linked to S-4FB group. Then these two groups react to provide a covalent Ab-DNA conjugate.

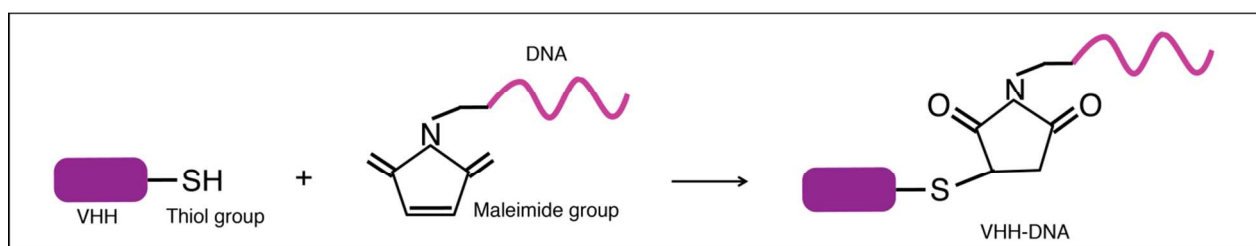

**Figure S2** Schematic representation of nanobody-DNA conjugation reaction: the Cys thiol group at the C-term of VHH reacts with the maleimide group attached to the 5' end of the DNA sequence.

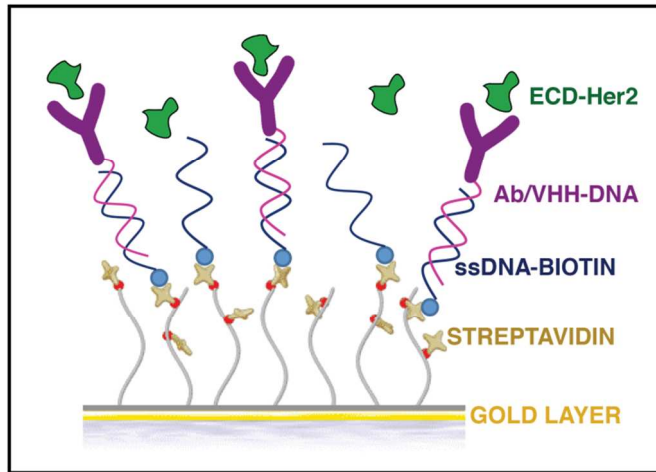

**Figure S3** Schematic representation of the SPR experimental approach: the ssDNA is attached on streptavidin (SA) surface through streptavidin-biotin bond; then the ligand Ab-DNA conjugate is immobilized by hybridization and the ECD-Her2 is run as analyte over the surface.

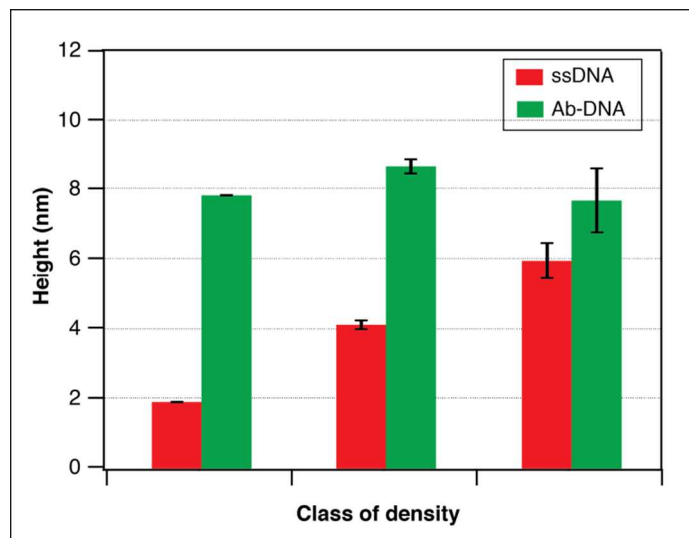

**Figure S4** Histogram created collecting different experiments (number of experiments: 30); data are subdivided into classes of density defined through the ssDNA patches relative height. Error bars represent the standard deviation; red: grafting of ssDNA; green: hybridization of Ab-cDNA conjugate.

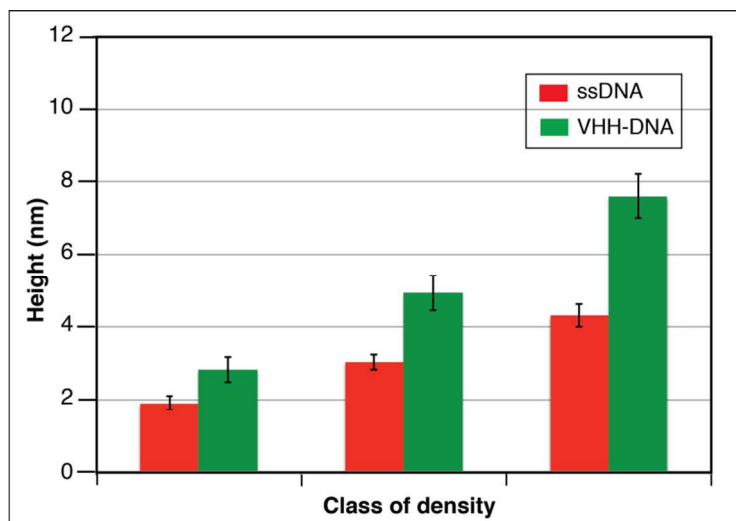

**Figure S5** Histogram created collecting different experiments (number of experiments: 30); data are subdivided into classes of density defined through the ssDNA patches relative height. Error bars represent the standard deviation; red: grafting of ssDNA; green: hybridization of Nb-cDNA conjugate.

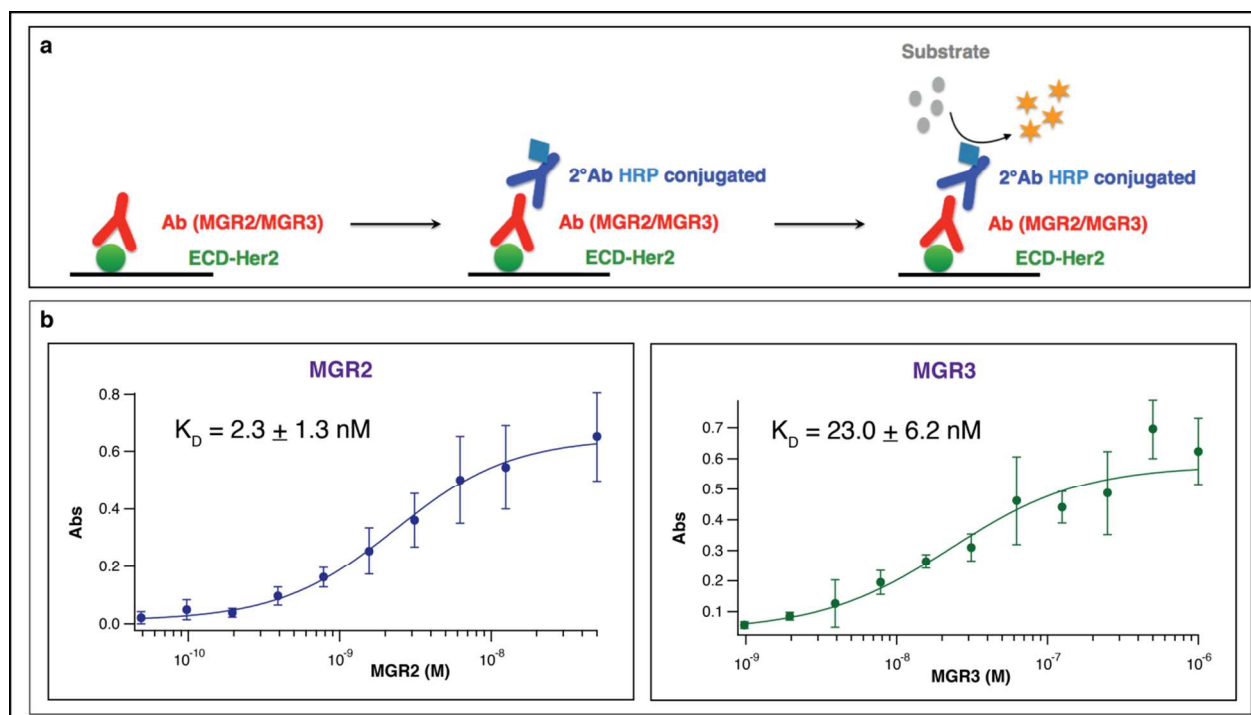

**Figure S6** Indirect ELISA. (A) Schematic representation of the assay. (B) Determination of binding affinity between ECD-Her2 and antibodies (MGR2 and MGR3). Absorbance is measured at 450 nm and plotted as a function of Ab concentration (values in duplicate). Data are fitted with Hill equation.
